# Supplementary material for: Association of Medicaid Expansion With Opioid Overdose Mortality in the United States
Source: PubMed Central journal article supplement (PMC6991255; doi:10.1001/jamanetworkopen.2019.19066), 2020-01-10
Supplement: jamanetwopen-3-e1919066-s001.pdf [file jamanetwopen-3-e1919066-s001.pdf]

## Supplementary Online Content

Kravitz-Wirtz N, Davis CS, Ponicki WR, et al. Association of Medicaid expansion with opioid overdose mortality in the United States. *JAMA Netw Open*. 2020;3(1):e1919066.  
doi:10.1001/jamanetworkopen.2019.19066

**eFigure.** Opioid-Related Overdose Deaths per 100,000 People in United States Counties, by State Medicaid Expansion Status, 2001-17

**eTable 1.** Relative Rates Associated With Medicaid Expansion and County Characteristics, Total Opioid-Related Overdose Deaths and by Class of Opioid

**eTable 2.** Relative Rates Associated With Medicaid Expansion and County Characteristics, Total Opioid-Related Overdose Deaths, by Primary and Alternative Model Specifications

This supplementary material has been provided by the authors to give readers additional information about their work.

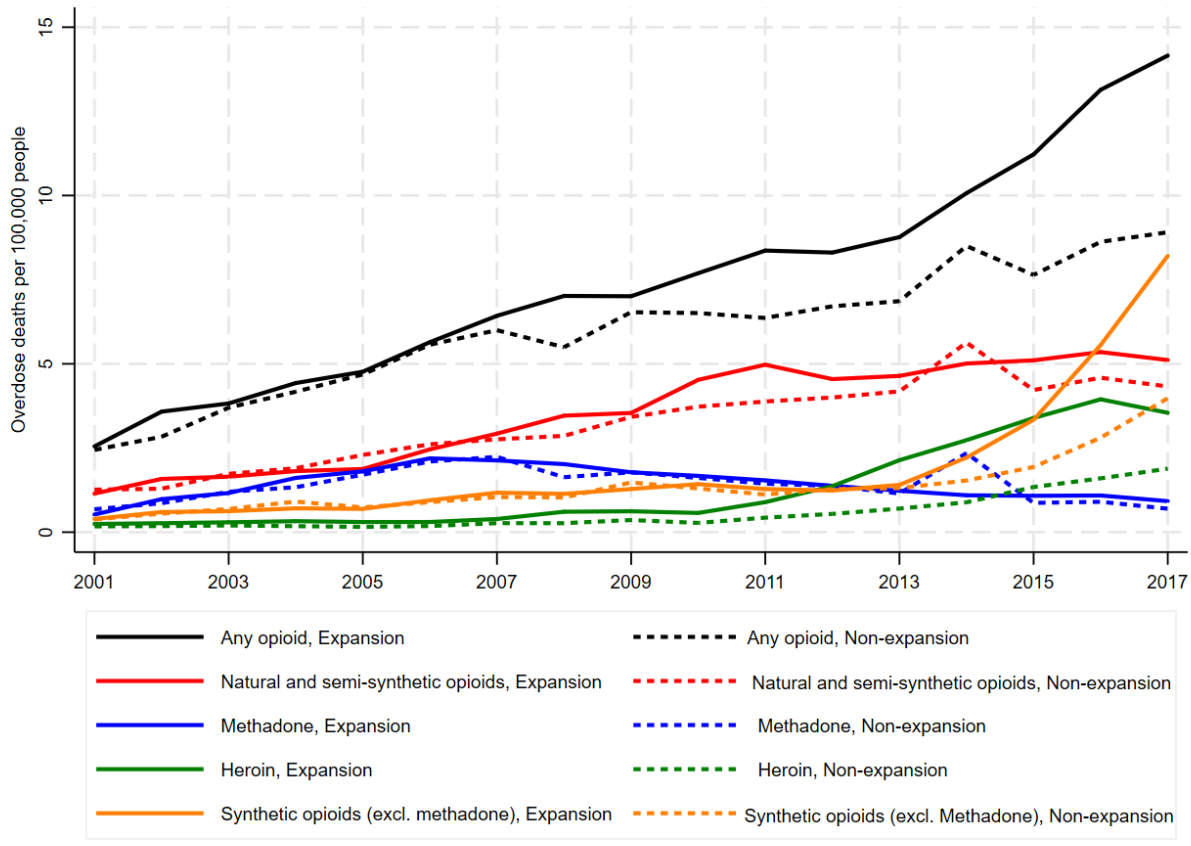

**eFigure.** Opioid-related overdose deaths per 100,000 people in United States counties, by state Medicaid expansion status, 2001-17

eTable 1. Relative rates associated with Medicaid expansion and county characteristics, total opioid-related overdose deaths and by class of opioid

|                                      | Any opioid |             | Natural and semi-synthetic opioids |             | Methadone |             | Heroin |             | Synthetic opioids (excl. Methadone) |             |
|--------------------------------------|------------|-------------|------------------------------------|-------------|-----------|-------------|--------|-------------|-------------------------------------|-------------|
|                                      | RR         | 95% CI      | RR                                 | 95% CI      | RR        | 95% CI      | RR     | 95% CI      | RR                                  | 95% CI      |
| Medicaid expansion                   | 0.94       | [0.91-0.98] | 1.03                               | [0.98-1.08] | 1.11      | [1.04-1.19] | 0.89   | [0.84-0.94] | 0.90                                | [0.84-0.96] |
| Time                                 | 1.08       | [1.08-1.09] | 1.20                               | [1.19-1.21] | 1.29      | [1.27-1.32] | 1.25   | [1.23-1.27] | 0.87                                | [0.86-0.89] |
| Time squared                         | 1.00       | [1.00-1.00] | 0.99                               | [0.99-0.99] | 0.98      | [0.98-0.99] | 1.00   | [1.00-1.00] | 1.01                                | [1.01-1.01] |
| Overall mortality rate (per 1,000)   | 1.05       | [1.05-1.06] | 1.06                               | [1.05-1.06] | 1.06      | [1.06-1.07] | 1.05   | [1.04-1.06] | 1.05                                | [1.05-1.06] |
| Proportion aged 0-19                 | 0.99       | [0.99-1.00] | 1.00                               | [0.99-1.01] | 1.00      | [0.99-1.01] | 1.05   | [1.04-1.07] | 0.99                                | [0.98-0.99] |
| Proportion aged 20-24                | 1.01       | [1.00-1.02] | 1.01                               | [1.00-1.03] | 1.03      | [1.01-1.05] | 0.98   | [0.95-1.01] | 1.05                                | [1.03-1.07] |
| Proportion aged 25-44                | 1.03       | [1.03-1.04] | 1.01                               | [1.00-1.02] | 1.03      | [1.02-1.04] | 1.06   | [1.05-1.07] | 1.04                                | [1.03-1.05] |
| Proportion aged 45-64                | 1.03       | [1.02-1.04] | 1.02                               | [1.01-1.03] | 1.07      | [1.05-1.08] | 1.00   | [0.98-1.02] | 1.09                                | [1.07-1.10] |
| Proportion male                      | 0.97       | [0.96-0.98] | 0.99                               | [0.98-1.00] | 0.95      | [0.93-0.96] | 0.93   | [0.91-0.94] | 0.97                                | [0.95-0.98] |
| Proportion white                     | 1.00       | [1.00-1.00] | 1.00                               | [1.00-1.00] | 1.00      | [1.00-1.01] | 0.99   | [0.99-1.00] | 1.01                                | [1.01-1.02] |
| Proportion black                     | 0.99       | [0.99-1.00] | 0.99                               | [0.99-1.00] | 0.99      | [0.98-0.99] | 1.00   | [1.00-1.01] | 1.01                                | [1.00-1.01] |
| Proportion Latinx                    | 1.01       | [1.01-1.01] | 1.00                               | [1.00-1.01] | 1.01      | [1.00-1.01] | 0.99   | [0.99-1.00] | 1.02                                | [1.01-1.02] |
| Proportion families in poverty       | 0.99       | [0.99-1.00] | 1.00                               | [0.99-1.00] | 1.01      | [1.00-1.01] | 0.99   | [0.98-1.00] | 0.97                                | [0.96-0.97] |
| Median HH income (\$10,000s)         | 0.96       | [0.94-0.97] | 0.96                               | [0.94-0.98] | 0.97      | [0.95-0.99] | 1.29   | [1.26-1.33] | 0.74                                | [0.72-0.76] |
| Proportion unemployed                | 1.00       | [0.99-1.00] | 1.01                               | [1.01-1.01] | 0.98      | [0.98-0.99] | 0.98   | [0.98-0.98] | 0.99                                | [0.99-0.99] |
| Population density                   | 1.04       | [1.02-1.06] | 1.03                               | [1.00-1.05] | 1.04      | [1.01-1.07] | 1.05   | [1.01-1.09] | 1.03                                | [1.00-1.05] |
| Overdose Good Samaritan law          | 1.02       | [1.00-1.04] | 0.93                               | [0.90-0.96] | 1.05      | [1.00-1.11] | 1.17   | [1.13-1.22] | 1.09                                | [1.05-1.14] |
| Naloxone access law                  | 1.12       | [1.10-1.15] | 1.14                               | [1.10-1.17] | 1.13      | [1.08-1.19] | 1.09   | [1.05-1.13] | 1.24                                | [1.19-1.29] |
| Medical marijuana law                | 1.21       | [1.18-1.25] | 1.05                               | [1.01-1.10] | 1.22      | [1.15-1.30] | 0.88   | [0.84-0.93] | 1.55                                | [1.47-1.63] |
| Prescription drug monitoring program | 0.95       | [0.94-0.97] | 0.96                               | [0.93-0.98] | 0.89      | [0.86-0.92] | 1.14   | [1.10-1.19] | 0.88                                | [0.84-0.91] |

Notes: Posterior results are from Bayesian hierarchical Poisson analyses of 3109 US counties over the years 2001-17 (total n=52,853). Raw Poisson coefficients and credible intervals have been exponentiated and are thus interpretable as relative rates. Additional adjustments include state-level fixed effects, county-level random intercepts and trends, county-level random effects for Medicaid expansion, and conditional autoregressive (CAR) random effects.

eTable 2. Relative rates associated with Medicaid expansion and county characteristics, total opioid-related overdose deaths, by primary and alternative model specifications

|                                                                                                                                                                                                                                                                                                                                                                                                                                                                           | Primary model |             | Medicaid expansion, No lag <sup>a</sup> |             | Excluding states with high under-reporting <sup>b</sup> |             |
|---------------------------------------------------------------------------------------------------------------------------------------------------------------------------------------------------------------------------------------------------------------------------------------------------------------------------------------------------------------------------------------------------------------------------------------------------------------------------|---------------|-------------|-----------------------------------------|-------------|---------------------------------------------------------|-------------|
|                                                                                                                                                                                                                                                                                                                                                                                                                                                                           | RR            | 95% CI      | RR                                      | 95% CI      | RR                                                      | 95% CI      |
| Medicaid expansion                                                                                                                                                                                                                                                                                                                                                                                                                                                        | 0.94          | [0.91-0.98] | 0.93                                    | [0.90-0.97] | 0.91                                                    | [0.88-0.94] |
| Time                                                                                                                                                                                                                                                                                                                                                                                                                                                                      | 1.08          | [1.08-1.09] | 1.07                                    | [1.06-1.08] | 1.08                                                    | [1.07-1.09] |
| Time squared                                                                                                                                                                                                                                                                                                                                                                                                                                                              | 1.00          | [1.00-1.00] | 1.00                                    | [1.00-1.00] | 1.00                                                    | [1.00-1.00] |
| Overall mortality rate (per 1,000)                                                                                                                                                                                                                                                                                                                                                                                                                                        | 1.05          | [1.05-1.06] | 1.05                                    | [1.05-1.06] | 1.05                                                    | [1.05-1.05] |
| Proportion aged 0-19                                                                                                                                                                                                                                                                                                                                                                                                                                                      | 0.99          | [0.99-1.00] | 0.99                                    | [0.99-1.00] | 0.99                                                    | [0.99-1.00] |
| Proportion aged 20-24                                                                                                                                                                                                                                                                                                                                                                                                                                                     | 1.01          | [1.00-1.02] | 1.01                                    | [1.00-1.02] | 1.02                                                    | [1.01-1.03] |
| Proportion aged 25-44                                                                                                                                                                                                                                                                                                                                                                                                                                                     | 1.03          | [1.03-1.04] | 1.03                                    | [1.02-1.04] | 1.04                                                    | [1.03-1.05] |
| Proportion aged 45-64                                                                                                                                                                                                                                                                                                                                                                                                                                                     | 1.03          | [1.02-1.04] | 1.03                                    | [1.02-1.04] | 1.04                                                    | [1.03-1.05] |
| Proportion male                                                                                                                                                                                                                                                                                                                                                                                                                                                           | 0.97          | [0.96-0.98] | 0.97                                    | [0.97-0.98] | 0.97                                                    | [0.96-0.98] |
| Proportion white                                                                                                                                                                                                                                                                                                                                                                                                                                                          | 1.00          | [1.00-1.00] | 1.00                                    | [1.00-1.00] | 1.00                                                    | [1.00-1.00] |
| Proportion black                                                                                                                                                                                                                                                                                                                                                                                                                                                          | 0.99          | [0.99-1.00] | 0.99                                    | [0.99-1.00] | 0.99                                                    | [0.99-0.99] |
| Proportion Latinx                                                                                                                                                                                                                                                                                                                                                                                                                                                         | 1.01          | [1.01-1.01] | 1.01                                    | [1.01-1.01] | 1.00                                                    | [1.00-1.01] |
| Proportion families in poverty                                                                                                                                                                                                                                                                                                                                                                                                                                            | 0.99          | [0.99-1.00] | 0.99                                    | [0.99-1.00] | 1.00                                                    | [0.99-1.00] |
| Median HH income (\$10,000s)                                                                                                                                                                                                                                                                                                                                                                                                                                              | 0.96          | [0.94-0.97] | 0.94                                    | [0.93-0.95] | 0.95                                                    | [0.94-0.97] |
| Proportion unemployed                                                                                                                                                                                                                                                                                                                                                                                                                                                     | 1.00          | [0.99-1.00] | 1.00                                    | [0.99-1.00] | 1.00                                                    | [1.00-1.00] |
| Population density                                                                                                                                                                                                                                                                                                                                                                                                                                                        | 1.04          | [1.02-1.06] | 1.04                                    | [1.02-1.06] | 1.07                                                    | [1.05-1.09] |
| Overdose Good Samaritan law                                                                                                                                                                                                                                                                                                                                                                                                                                               | 1.02          | [1.00-1.04] | 1.05                                    | [1.03-1.07] | 1.02                                                    | [1.00-1.04] |
| Naloxone access law                                                                                                                                                                                                                                                                                                                                                                                                                                                       | 1.12          | [1.10-1.15] | 1.12                                    | [1.10-1.14] | 1.12                                                    | [1.10-1.15] |
| Medical marijuana law                                                                                                                                                                                                                                                                                                                                                                                                                                                     | 1.21          | [1.18-1.25] | 1.22                                    | [1.19-1.25] | 1.23                                                    | [1.20-1.26] |
| Prescription drug monitoring program                                                                                                                                                                                                                                                                                                                                                                                                                                      | 0.95          | [0.94-0.97] | 0.97                                    | [0.96-0.99] | 0.96                                                    | [0.95-0.98] |
| <sup>a</sup> Medicaid expansion status was measured concurrently with opioid overdose deaths (rather than with a 1-year lag)                                                                                                                                                                                                                                                                                                                                              |               |             |                                         |             |                                                         |             |
| <sup>b</sup> 4 states with high levels of underreporting of specific drugs (Alabama, Indiana, Louisiana, and Pennsylvania) were excluded; total n=47,923                                                                                                                                                                                                                                                                                                                  |               |             |                                         |             |                                                         |             |
| Notes: Posterior results are from Bayesian hierarchical Poisson analyses of 3109 US counties over the years 2001-17 (total n=52,853). Raw Poisson coefficients and credible intervals have been exponentiated and are thus interpretable as relative rates. Additional adjustments include state-level fixed effects, county-level random intercepts and trends, county-level random effects for Medicaid expansion, and conditional autoregressive (CAR) random effects. |               |             |                                         |             |                                                         |             |
